# Supplementary material for: Bio-inspired lubricant drug delivery particles for the treatment of osteoarthritis
Source: Royal Society of Chemistry journal article supplement (doi:10.1039/d0nr04013d), 2020-01-01
Supplement: d0nr04013d1.pdf [file d0nr04013d1.pdf]

## Supplementary

### Bio-inspired lubricant drug delivery particle for treatment of osteoarthritis

Lei Yang<sup>a,b,c</sup>, Yuxiao Liu<sup>b,c</sup>, Xin Shou<sup>a,b,c</sup>, Dong Ni<sup>a\*</sup>, Tiantian Kong<sup>a\*</sup> and Yuanjin  
Zhao<sup>b,c\*</sup>

<sup>a</sup>Guangdong Key Laboratory for Biomedical Measurements and Ultrasound Imaging,  
Department of Biomedical Engineering, Shenzhen University, Shenzhen 518060,  
China;

<sup>b</sup>Department of Rheumatology and Immunology, Nanjing Drum Tower Hospital,  
Clinical College of Xuzhou Medical University, Nanjing 210008, P. R. China;

<sup>c</sup>State Key Laboratory of Bioelectronics, School of Biological Science and Medical  
Engineering, Southeast University, Nanjing 210096, China.

E-mail: nidong@szu.edu.cn, ttkong@szu.edu.cn, yjzhao@seu.edu.cn

#### Author contributions

Y.J.Z. conceived the conceptualization and designed the experiment; L.Y. carried  
out the experiments; L.Y., Y.X.L. and X.S. analyzed data and wrote the paper; D.N.  
and T.T.K contributed to scientific discussion of the article.

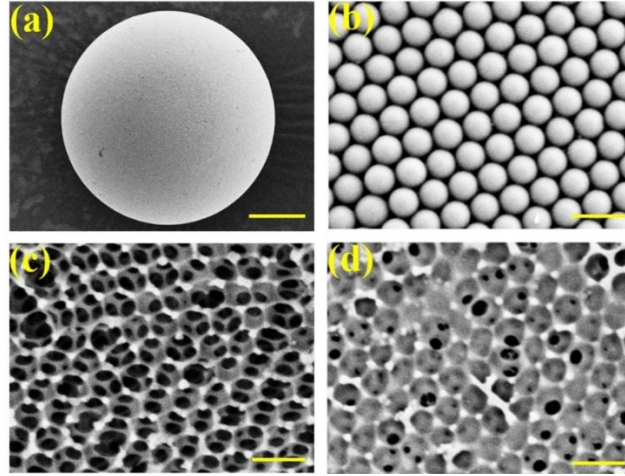

1

2 **Fig. S1.** SEM images: (a) The whole view of SCCBs; (b) The surface of SCCBs; (c)  
 3 The surface of pNIPAM inverse opal particles; (d) The surface of inverse opal particles  
 4 with HA. The scale bars are 50  $\mu\text{m}$  in (a) and 500 nm in (b-d).

5

6

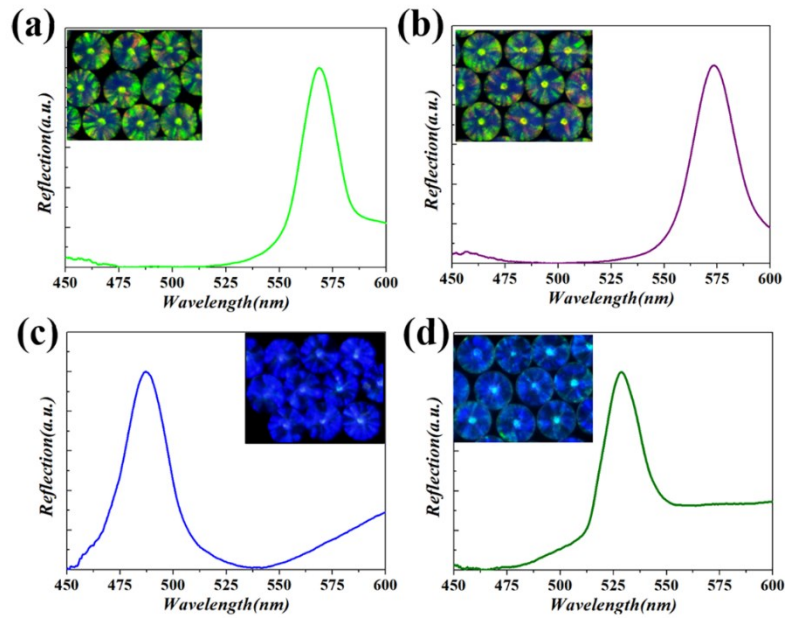

7

8 **Fig.S2.** (a-d) The reflection spectra of (a) template SCCBs, (b) pNIPAM hybrid  
 9 SCCBs, (c) inverse opal particles, and (d) inverse opal particles with HA&DS.

10

11

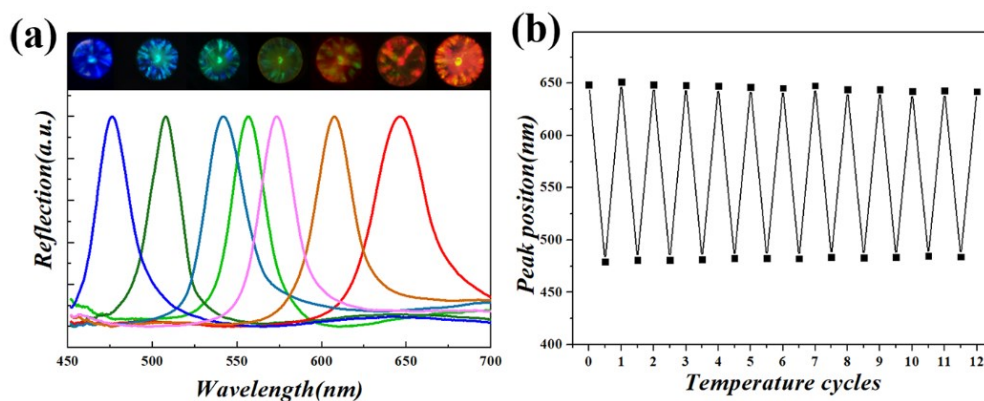

1  
2 **Fig. S3.** (a-b) The images of reflection peaks (a) and the peak position of the particles  
3 during temperature changes (b).

4

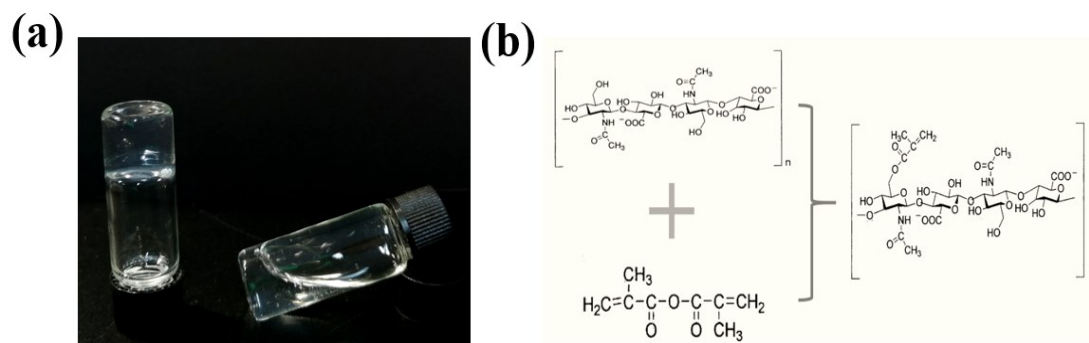

5

6 **Fig. S4.** (a) The HA before (right) and after (left) UV irradiation; (b) Synthesis process  
7 of modified HA by methacrylic anhydride.

8

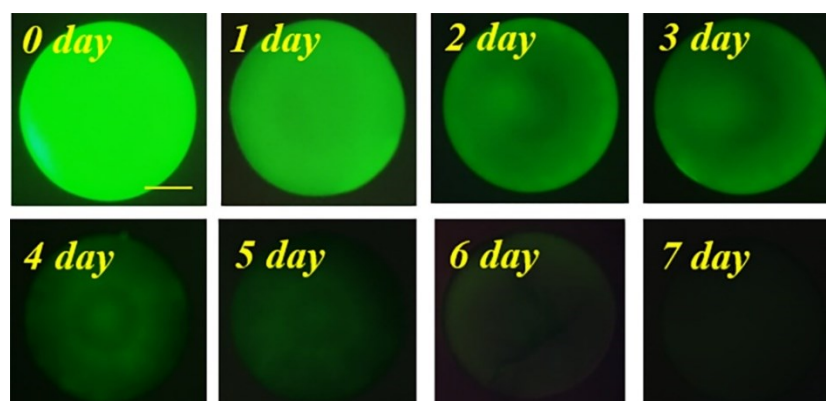

9

10 **Fig. S5.** The fluorescent images of FITC particles after 0-7 days drug releasing. The  
11 scale bars are 50  $\mu$ m.

12

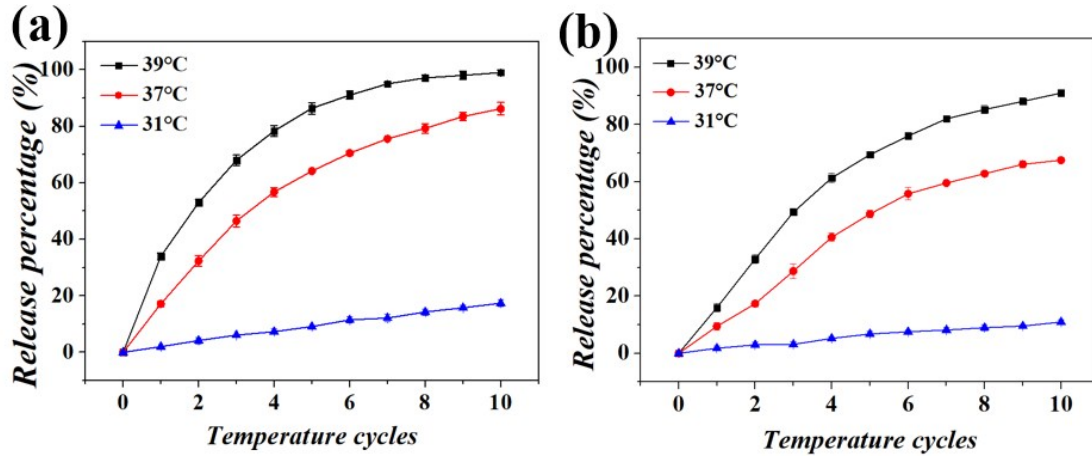

1  
2  
3 **Fig. S6.** (a-b) The different HA particles loaded with DS under different stimulating  
4 temperature cycle: (a) 1% HA particles loaded with DS in the temperature cycle; (b)  
5 4% HA particles loaded with DS in the temperature cycle.

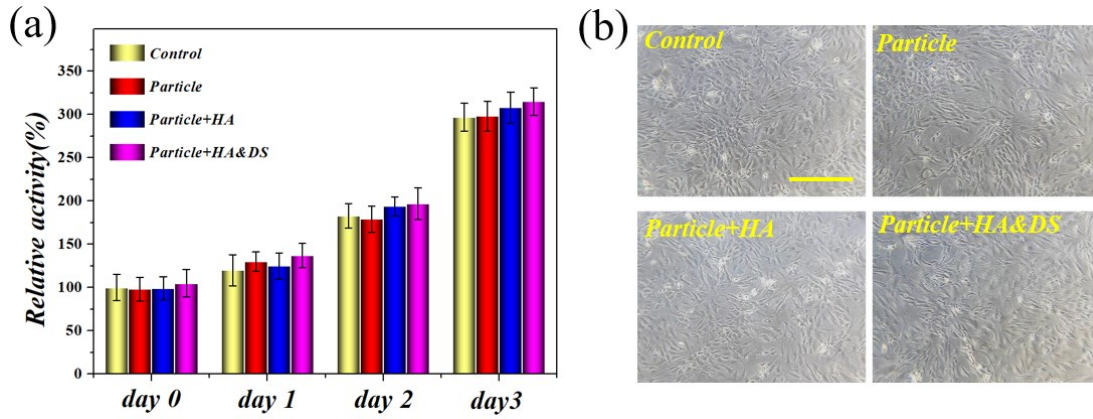

8  
9 **Fig. S7.** (a) The results of MTT assay on day 0, day 1, day 2 and day 3; (b) The  
10 microscope images of the human primary chondrocytes on day 3. The scale bar is 100  
11  $\mu\text{m}$ .

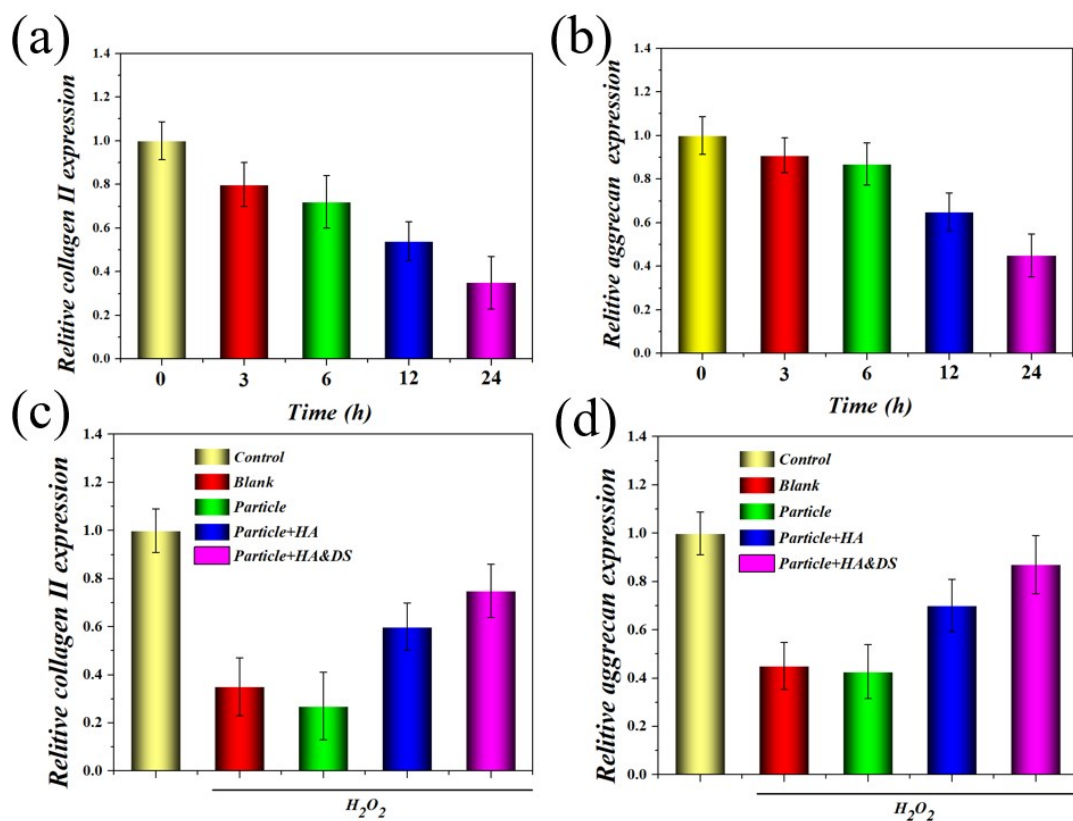

1  
2 **Fig. S8.** (a-b) The relative mRNA expression of (a) collagen II and (b) aggrecan in  
3 chondrocytes after treated with 200  $\mu\text{M}$   $\text{H}_2\text{O}_2$  for different times; (c-d) The relative  
4 mRNA expression of (c) collagen II and (d) aggrecan in chondrocytes after treated with  
5 200  $\mu\text{M}$   $\text{H}_2\text{O}_2$  and particles for 24 h.

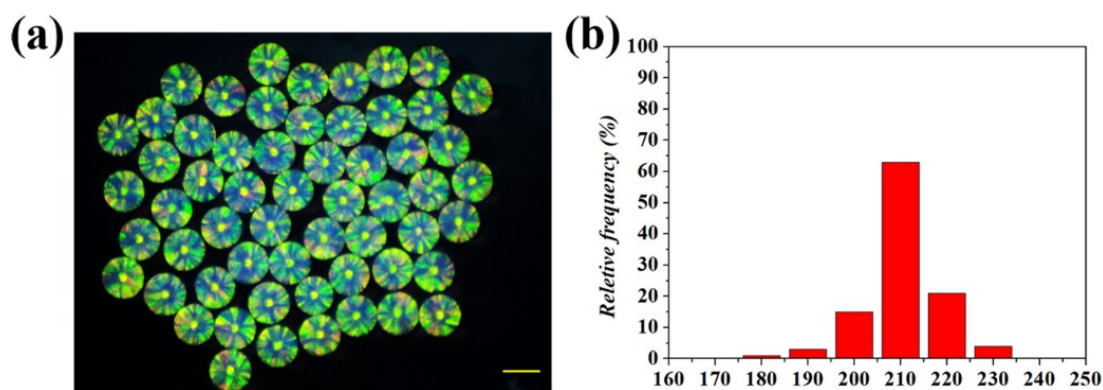

8  
9 **Fig. S9.** (a-b) The morphology (a) and statistical size distribution histogram (b) of the  
10 SCCBs. The scale bar is 200  $\mu\text{m}$ .



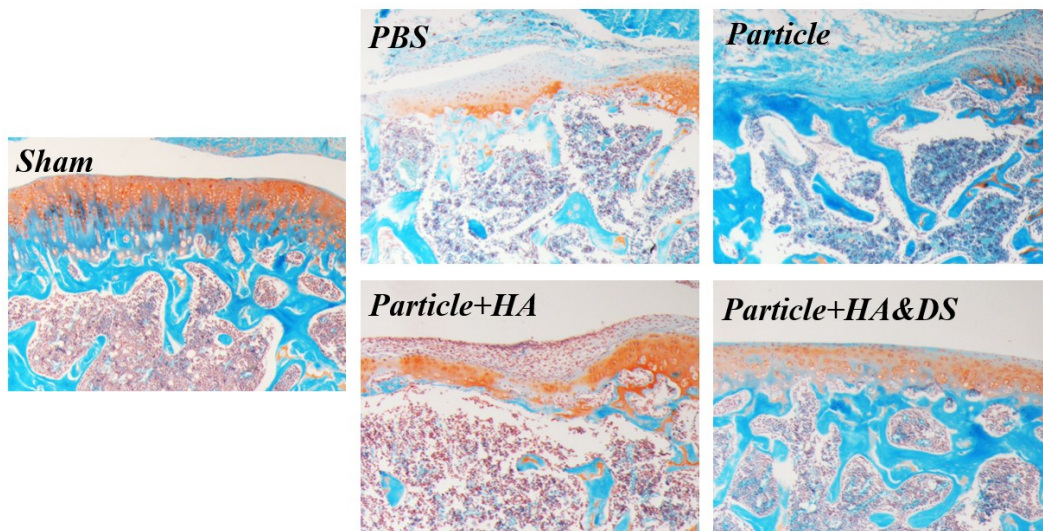

1  
2 **Fig. S10.** The more areas of tibia plateau in different groups.

3

4

5 **Table. S1.** Primer sequences used for RT-qPCR.

| Gene               | Forward (5'-3')        | Reverse (5'-3')        | Tm(°C) |
|--------------------|------------------------|------------------------|--------|
| <i>Aggrecan</i>    | ATGCCCAAGACTACCAGTGG   | ATGCCCAAGACTACCAGTGG   | 60     |
| <i>Collagen II</i> | CCAGTTGGGAGTAATGCAAGG  | ACACCAGGTTCCACCAGGTTCA | 60     |
| <i>β-actin</i>     | GTTTGAGACCTTCAACACCCCC | GTGGCCATCTCTCTTGCTCGAA | 60     |

6

7
